# Supplementary figures and images for: Changes in ST segment elevation myocardial infarction hospitalisations in China from 2011 to 2015
Source: HighWire-hosted journal article supplement (doi:10.1136/openhrt-2021-001666), 2021-09-01

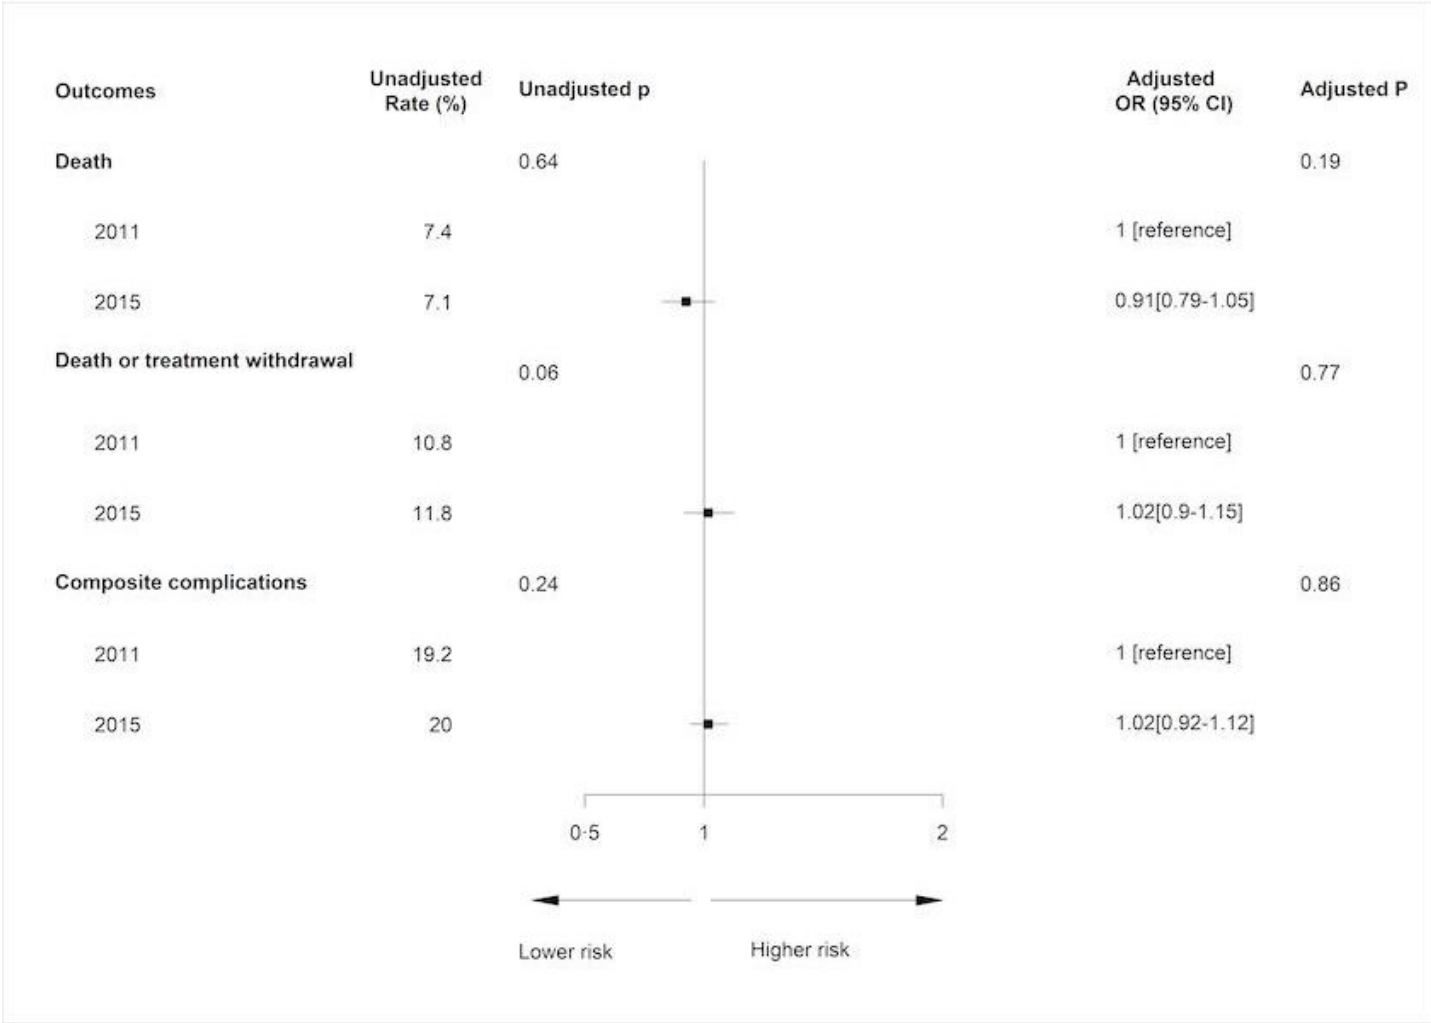

Supplement: openhrt-2021-001666supp002_data_supplement.pdf [file openhrt-2021-001666supp002_data_supplement.pdf]

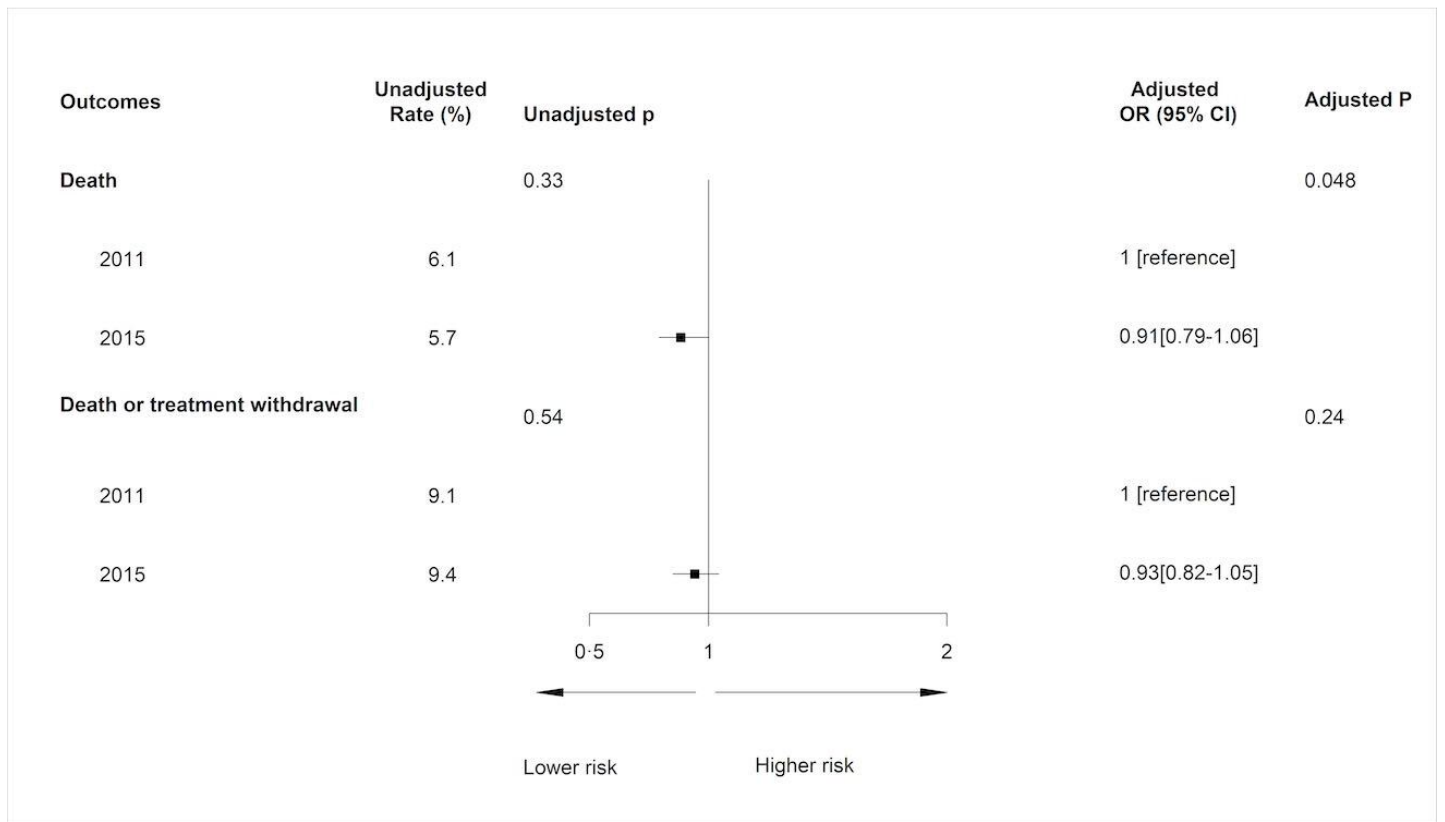

Supplement: openhrt-2021-001666supp003_data_supplement.pdf [file openhrt-2021-001666supp003_data_supplement.pdf]
